# Supplementary material for: Factors associated with return to work of breast cancer survivors: a systematic review
Source: PubMed Central journal article supplement (PMC4251139; doi:10.1186/1471-2458-14-s3-s8), 2014-11-24
Supplement: 1471-2458-14-S3-S8-S1.pdf [file 1471-2458-14-S3-S8-S1.pdf]

Additional file 1

Summary of the Quality Assessment Tools

| <b><i>Study Design</i></b> | <b><i>Quality Assessment Tool</i></b>                                               | <b><i>Quality Rating of study</i></b>                                                      |
|----------------------------|-------------------------------------------------------------------------------------|--------------------------------------------------------------------------------------------|
| Cross Sectional            | BSA Medical Sociology Group                                                         | Score 1-7<br>1-2 (Low)<br>3-5 (Moderate)<br>6-7 (High)                                     |
| Randomised Trial           | Jadad Scale ( <i>Jadad et al 96</i> )                                               | < 3 ( Poor)<br>≥3 (High)                                                                   |
| Cohort Study               | Newcastle Ottawa Scale, NOS                                                         | Selection (Max 4 *)<br>Comparability (Max 2*)<br>Outcome / Exposure (Max 3*)               |
| Longitudinal Study         | The Quality Assessment Tool for Systematic Reviews of Observational Studies (QATSO) | External validity (1 item)<br>Reporting (2 items)<br>Bias (1 item)<br>Confounding (1 item) |
| Qualitative Study          | National CASP Appraisal Tool                                                        | Score 1-10<br>1-3 (Low)<br>4-7 (Moderate)<br>8-10 (High)                                   |

Table: Summary of quality of included studies.

| <i>Author</i>                | <i>Year and Journal of Publication</i> | <i>Study Design</i> | <i>Quality Assessment Tool</i> | <i>Quality Rating of study</i>                                  | <i>Comments</i> |
|------------------------------|----------------------------------------|---------------------|--------------------------------|-----------------------------------------------------------------|-----------------|
| E. Ahn <i>et al</i>          | 2009, Breast Cancer Res Treat          | Cross Sectional     | BSA Medical Sociology Group    | 7                                                               | High            |
| K. Carlsen <i>et al</i>      | 2013, Acta Oncologica                  | Cross Sectional     | BSA Medical Sociology Group    | 7                                                               | High            |
| J.A. Hansen <i>et al</i>     | 2008, Occup Environ Med                | Cross Sectional     | BSA Medical Sociology Group    | 6                                                               | High            |
| S.Q. Fantoni <i>et al</i>    | 2010, J Occup Rehabil                  | Cohort study        | Newcastle Ottawa Scale, NOS    | Selection **<br>Comparability *<br>Outcome /<br>Exposure **     |                 |
| M. Drolet <i>et al</i>       | 2005, CMAJ                             | Cohort study        | Newcastle Ottawa Scale, NOS    | Selection ****<br>Comparability *<br>Outcome /<br>Exposure ***  |                 |
| M. Drolet <i>et al</i>       | 2005, Journal of Clinical Oncology     | Cohort study        | Newcastle Ottawa Scale, NOS    | Selection ****<br>Comparability **<br>Outcome /<br>Exposure *** |                 |
| A. Johnsson <i>et al</i>     | 2011, Work                             | Cohort study        | Newcastle Ottawa Scale, NOS    | Selection ***<br>Comparability *<br>Outcome /<br>Exposure **    |                 |
| R.M. Villaverde <i>et al</i> | 2008, Occupational Medicine            | Cohort study        | Newcastle Ottawa Scale, NOS    | Selection *<br>Comparability *<br>Outcome /<br>Exposure *       |                 |

|                                     |                                                  |                       |                                                                                           |                                                                 |      |
|-------------------------------------|--------------------------------------------------|-----------------------|-------------------------------------------------------------------------------------------|-----------------------------------------------------------------|------|
| E. Hedayati<br><i>et al</i>         | 2012, Scand J<br>Caring Sci                      | Cohort study          | Newcastle Ottawa Scale, NOS                                                               | Selection ***<br>Comparability **<br>Outcome /<br>Exposure ***  |      |
| B. Hauglann<br><i>et al</i>         | 2012, J Cancer<br>Surviv                         | Cohort study          | Newcastle Ottawa Scale, NOS                                                               | Selection ****<br>Comparability **<br>Outcome /<br>Exposure *** |      |
| E. Maunsell<br><i>et al</i>         | 2004, Journal<br>of National<br>Cancer Institute | Cohort study          | Newcastle Ottawa Scale, NOS                                                               | Selection ****<br>Comparability **<br>Outcome /<br>Exposure **  |      |
| F. Balak<br><i>et al</i>            | 2008, J Occup<br>Rehabil                         | Cohort study          | Newcastle Ottawa Scale, NOS                                                               | Selection ***<br>Comparability *<br>Outcome /<br>Exposure ***   |      |
| M. J. Hasset<br><i>et al</i>        | 2009, Cancer                                     | Cohort study          | Newcastle Ottawa Scale, NOS                                                               | Selection ***<br>Comparability *<br>Outcome /<br>Exposure ***   |      |
| A. Johnsson<br><i>et al</i>         | 2009, Acta<br>Oncologica                         | Cohort study          | Newcastle Ottawa Scale, NOS                                                               | Selection **<br>Comparability **<br>Outcome /<br>Exposure **    |      |
| C. Roelen<br><i>et al</i>           | 2011, Breast<br>Cancer Res<br>Treat              | Longitudinal<br>study | The Quality Assessment Tool for<br>Systematic Reviews of<br>Observational Studies (QATSO) | External validity 1<br>Reporting 2<br>Bias 1<br>Confounding 0   | Good |
| R. R.<br>Brouknight<br><i>et al</i> | 2006, Journal<br>of Clinical<br>Oncology         | Longitudinal<br>study | The Quality Assessment Tool for<br>Systematic Reviews of<br>Observational Studies (QATSO) | External validity 0<br>Reporting 1<br>Bias 1<br>Confounding 0   | Fair |
| V.S. Blinder<br><i>et al</i>        | 2012, Cancer                                     | Longitudinal<br>study | The Quality Assessment Tool for<br>Systematic Reviews of                                  | External validity 1                                             | Good |

|                                 |                                                     |                        |                                                                                           |                                                               |      |
|---------------------------------|-----------------------------------------------------|------------------------|-------------------------------------------------------------------------------------------|---------------------------------------------------------------|------|
|                                 |                                                     |                        | Observational Studies (QATSO)                                                             | Reporting 2<br>Bias 1<br>Confounding 0                        |      |
| S. Lillehorn<br><i>et al</i>    | 2012, Scand J<br>of Caring Sci                      | Longitudinal<br>study  | The Quality Assessment Tool for<br>Systematic Reviews of<br>Observational Studies (QATSO) | External validity 1<br>Reporting 2<br>Bias 0<br>Confounding 0 | Fair |
| A. Johnsson<br><i>et al</i>     | 2007, Acta<br>Oncologica                            | Randomized<br>Trial    | Jadad Scale                                                                               | 2                                                             | Poor |
| C. Tiedtke<br><i>et al</i>      | 2012, BMC<br>Public Health                          | Qualitative<br>Studies | National CASP Appraisal Tool                                                              | 9                                                             | High |
| F.L. Tan<br><i>et al</i>        | 2012, Asia<br>pacific<br>J. Cancer Prev             | Qualitative<br>Studies | National CASP Appraisal Tool                                                              | 8                                                             | High |
| V.S Blinder<br><i>et al</i>     | 2012, Journal<br>of Community<br>Health             | Qualitative<br>Studies | National CASP Appraisal Tool                                                              | 9                                                             | High |
| C. Tiedtke<br><i>et al</i>      | 2012, J Occup<br>Rehabil                            | Qualitative<br>Studies | National CASP Appraisal Tool                                                              | 8                                                             | High |
| A. Johnsson<br><i>et al</i>     | 2010, Eur J<br>Cancer Care                          | Qualitative<br>Studies | National CASP Appraisal Tool                                                              | 8                                                             | High |
| S.J<br>Tamminga<br><i>et al</i> | 2012, Scand J<br>Work Environ<br>Health             | Qualitative<br>Studies | National CASP Appraisal Tool                                                              | 8                                                             | High |
| M. Nilsson<br><i>et al</i>      | 2011, European<br>Journal of<br>Oncology<br>Nursing | Qualitative<br>Studies | National CASP Appraisal Tool                                                              | 8                                                             | High |

## QUALITY ASSESSMENT OF CROSS SECTIONAL STUDIES (BSA Medical Sociology Group)

### Seven Quality Indicators:

- 1) **Appropriate Research Design**
- 2) **Appropriate Recruitment Strategy**
- 3) **Response Rate Reported**
- 4) **Sample Representative of Similar Population**
- 5) **Objective and Reliable Measures Used**
- 6) **Power Calculation/Justification of Numbers Reported**
- 7) **Appropriate Statistical Analysis**

**\*\* Y=Yes N=No [ Quality Indicators Met out of 7: 1-2 (Low)---- 3-5 (Moderate)----6-7 (High) ]**

| Author and year | Appropriate Research Design?<br>(Y/N) | Appropriate Recruitment Strategy?<br>(Y/N) | Response Rate?<br>(Y/N) % | Is Sample Representative? (All similar populations)<br>(Y/N) | Objective and Reliable Measures?<br>(Y/N) | Power Calculation/Justification of Numbers?<br>(Y/N) | Appropriate Statistical Analysis?<br>(Y/N) | Quality Indicators Met<br>(out of 7) |
|-----------------|---------------------------------------|--------------------------------------------|---------------------------|--------------------------------------------------------------|-------------------------------------------|------------------------------------------------------|--------------------------------------------|--------------------------------------|
|                 |                                       |                                            |                           |                                                              |                                           |                                                      |                                            |                                      |

## QUALITY ASSESSMENT FOR QUALITATIVE STUDIES

### Critical Appraisal Skill Programme (CASP):

Ten quality indicators:

1. Was there a clear statement of the aims of the research?
2. Is a qualitative methodology appropriate?
3. Was the research design appropriate to address the aims of the research?

4. Was the recruitment strategy appropriate to the aims of the research?
5. Were the data collected in a way that addressed the research issue?
6. Has the relationship between researcher and participants been adequately considered?
7. Have ethical issues been taken into consideration?
8. Was the data analysis sufficiently rigorous?
9. Is there a clear statement of findings?
10. How valuable is the research?

## **NEWCASTLE - OTTAWA QUALITY ASSESSMENT SCALE (NOS) OF COHORT STUDIES**

### ***Selection (Max 4 Stars)***

#### 1) Representativeness of the exposed cohort

- a) truly representative of the average \_\_\_\_\_ (describe) in the community \*
- b) somewhat representative of the average \_\_\_\_\_ in the community \*
- c) selected group of users, e.g. nurses, volunteers
- d) no description of the derivation of the cohort

#### 2) Selection of the non exposed cohort

- a) drawn from the same community as the exposed cohort \*
- b) drawn from a different source

c) no description of the derivation of the non exposed cohort

3) Ascertainment of exposure

a) secure record (e.g. surgical records) \*

b) structured interview \*

c) written self report

d) no description

4) Demonstration that outcome of interest was not present at start of study

a) yes \*

b) no

***Comparability (Max 2 Stars)***

1) Comparability of cohorts on the basis of the design or analysis

a) study controls for \_\_\_\_\_ (select the most important factor) \*

b) study controls for any additional factor \* (This criteria could be modified to indicate specific control for a second important factor.)

***Outcome (Max 3 Stars)***

1) Assessment of outcome

a) independent blind assessment \*

b) record linkage \*

c) self report

d) no description

2) Was follow-up long enough for outcomes to occur

a) yes (select an adequate follow up period for outcome of interest) \*

b) no

3) Adequacy of follow up of cohorts

a) complete follow up - all subjects accounted for \*

b) subjects lost to follow up unlikely to introduce bias - small number lost - > \_\_\_\_ % (select an adequate %) follow up, or description provided of those lost) \*

c) follow up rate < \_\_\_\_% (select an adequate %) and no description of those lost

d) no statement



## Assessing the Quality of Randomised Trial

### JADAD ASSESSMENT TOOL

| <b>JADAD SCORING CRITERIA</b>                                                                               | <b>Potential Score</b> | <b>Score Awarded</b> |
|-------------------------------------------------------------------------------------------------------------|------------------------|----------------------|
| 1 <sub>a</sub> . Was the study described as randomized?                                                     | + 1                    |                      |
| 1 <sub>b</sub> . Was the method of randomization described and appropriate to conceal allocation?           | +1                     |                      |
| 1 <sub>c</sub> . If described and inappropriate, describe:                                                  | -1                     |                      |
| 2 <sub>a</sub> . Was the study described as double blinded?                                                 | +1                     |                      |
| 2 <sub>b</sub> . Was the method of double-blinding described and appropriate to maintain a double blinding? | +1                     |                      |
| 2 <sub>c</sub> . Was the method of blinding inappropriate?                                                  | -1                     |                      |
| 3. Was there a description of withdrawals and drop outs?                                                    | +1                     |                      |
| <b>Final Score (0-5)</b>                                                                                    | <b>5</b>               | <b>_ /5</b>          |

## QUALITY ASSESSMENT OF LONGITUDINAL STUDIES

### The Quality Assessment Tool for Systematic Reviews of Observational Studies (QATSO) Score:

Five item for quality indicator

**1) External validity (1 item)** – addresses the extent to which the findings from the study can be generalised to the population from which the study subjects are derived.

**2) Reporting (2 items)** – assesses whether the information provided in the paper is sufficient to allow a reader to make an unbiased assessment of the findings of the study. One of the items is specific for prevalence studies.

**3) Bias (1 item)** – addresses bias in the measurement of the outcomes in a study.

**4) Confounding (1 item)** – addresses whether studies have applied adjustment for confounding in the analysis. This item is specific to studies concerning association of risk factors.

Although the QATSO Score consists of five items, users may select 4–5 items depending on the type of studies being evaluated. Studies achieving 67% or more in the score will be regarded as "good" quality; 34–66% "fair"; and, below 33% "poor".
